# Supplementary material for: Simulated Ageing of Crude Oil and Advanced Oxidation Processes for Water Remediation since Crude Oil Pollution
Source: MDPI journal article supplement (doi:10.3390/catal11080954), 2021-08-10
Supplement: s1 [file s1]

# Simulated Ageing of Crude Oil and Advanced Oxidation Processes for Water Remediation since Crude Oil Pollution

Filomena Lelario <sup>1</sup>, Giuliana Bianco <sup>1</sup>, Sabino Aurelio Bufo <sup>1,2,\*</sup> and Laura Scrano <sup>3</sup>

<sup>1</sup> Department of Sciences, University of Basilicata, Via dell'Ateneo Lucano 10, 85100 Potenza, Italy; filomena.lelario@unibas.it (F.L.); giuliana.bianco@unibas.it (G.B.)

<sup>2</sup> Department of Geography, Environmental Management & Energy Studies, University of Johannesburg, 2092 Johannesburg, South Africa; sabinob@uj.ac.za

<sup>3</sup> Department of European Cultures (DICEM), University of Basilicata, 75100 Matera, Italy; laura.scrano@unibas.it (L.S.)

\* Correspondence: sabino.bufo@unibas.it ; Tel.: +39-0971-6237

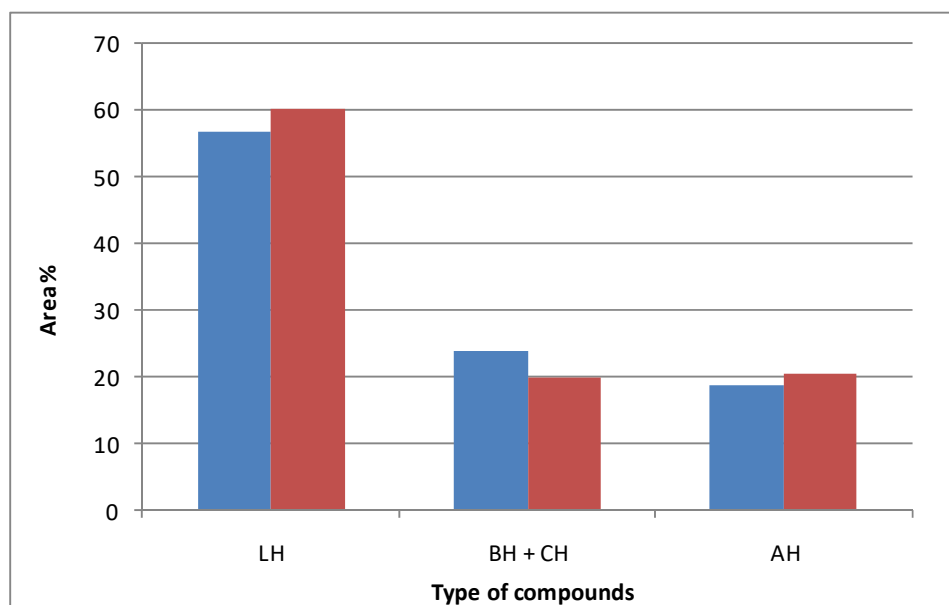

**Figure S1.** Percentage of compounds in crude oil as recognized by GC-MS (blue column) and <sup>1</sup>H NMR (red column).

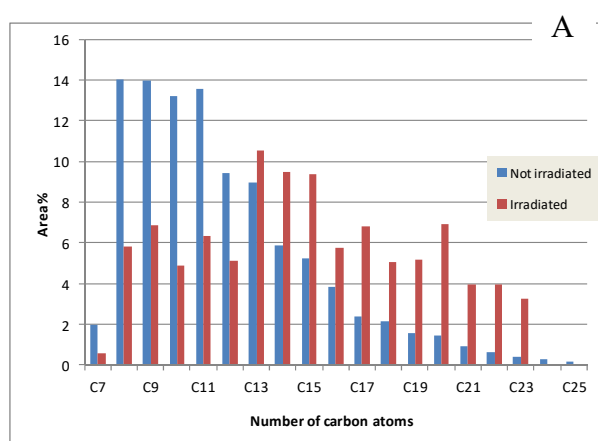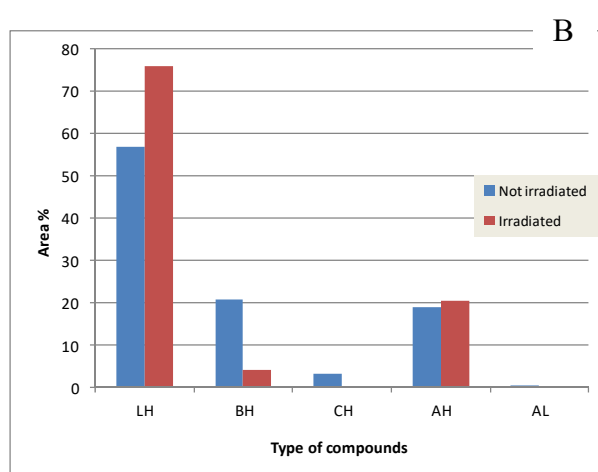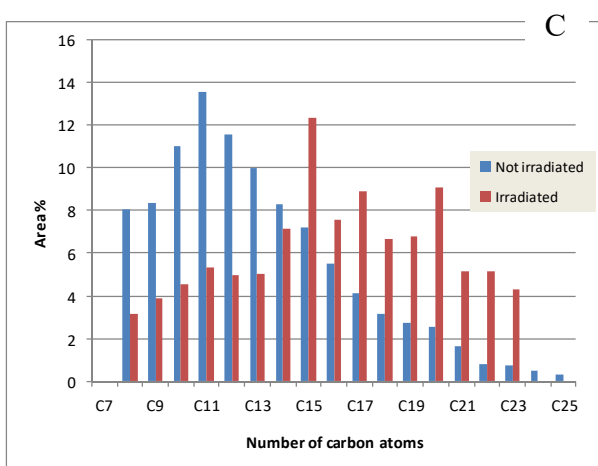

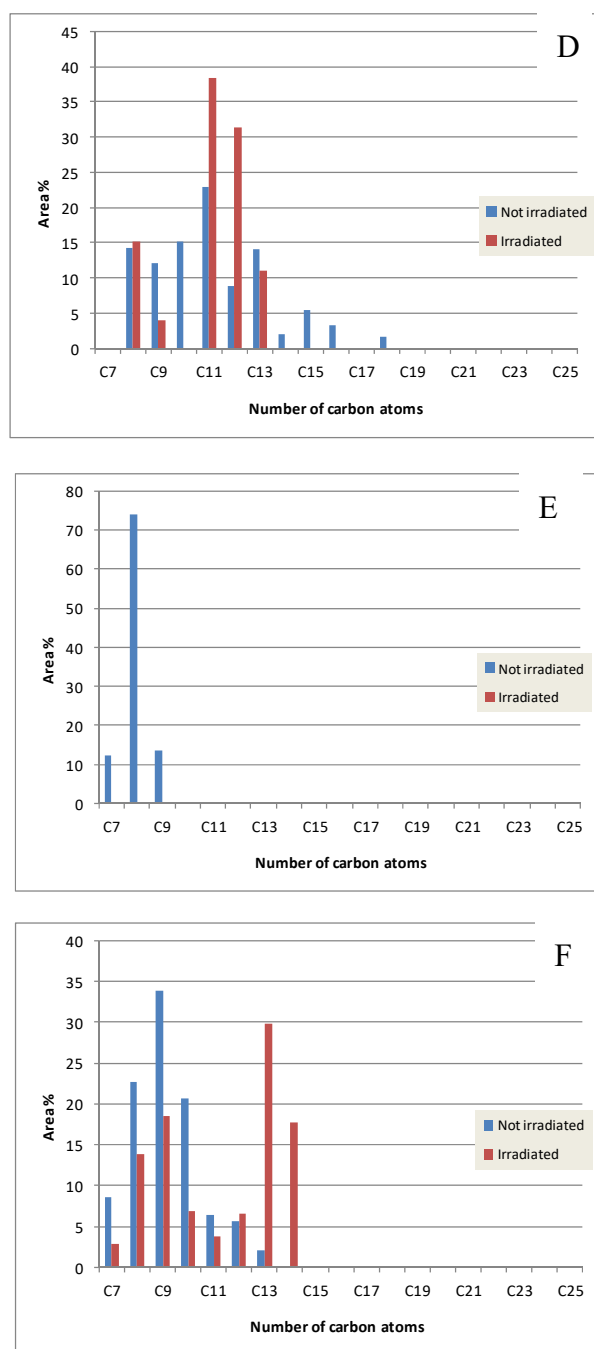

**Figure S2.** GC-MS compositional analysis of crude oil (**blue column**) and solar simulator irradiated crude oil (**red column**), as a function of the number of carbon atoms (**A**); composition of crude oil as a function of the type of compounds, LH: linear aliphatic hydrocarbons; BH: branched aliphatic hydrocarbons; CH: cyclic aliphatic hydrocarbons; AH: aromatic hydrocarbons; AL: alkenes (**B**); composition of the linear aliphatic hydrocarbons as a function of the number of carbon atoms (**C**); composition of the branched aliphatic hydrocarbons fraction as a function of the number of carbon atoms (**D**); composition of the cyclic aliphatic hydrocarbons as a function of the number of carbon atoms (**E**); composition of the aromatic hydrocarbons fraction as a function of the number of carbon atoms (**F**).

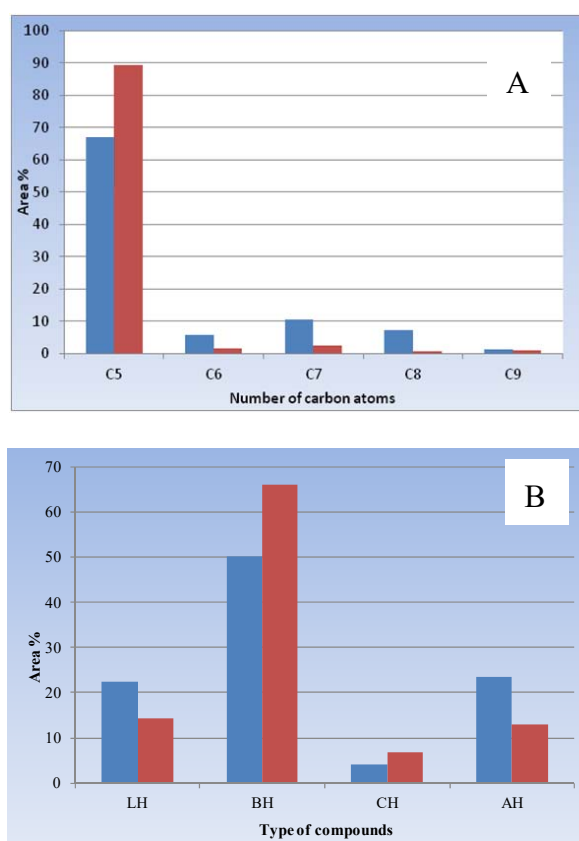

**Figure S3.** GC-MS compositional analysis of WSF crude oil before (**red column**) and after (**blue column**) photocatalysis: distribution of hydrocarbons as a function of the number of carbon atoms (**A**) and distribution of the compounds as a function of chemical species (**B**).

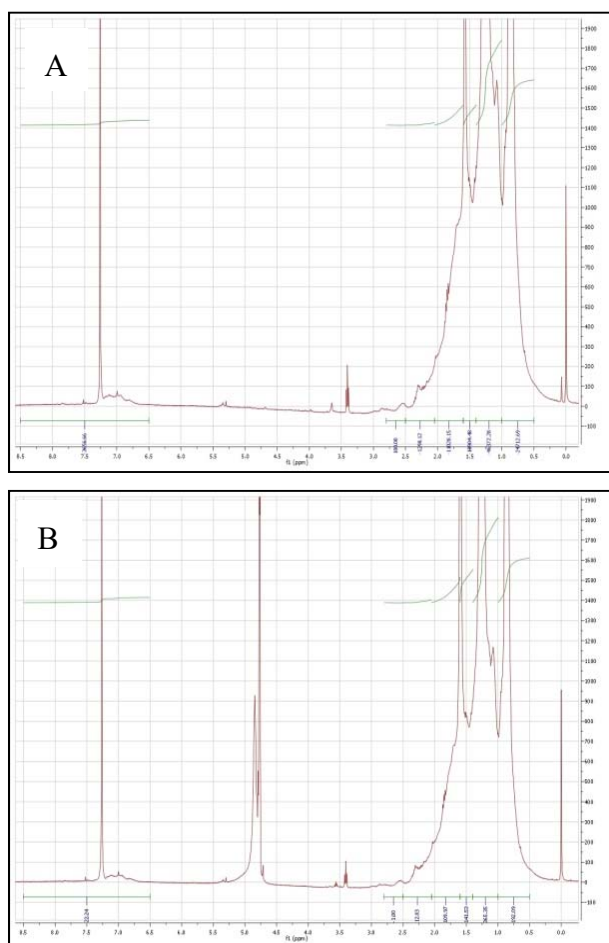

**Figure S4.**  $^1\text{H}$  NMR spectra of WSF crude oil before (A) and after (B) photocatalysis.

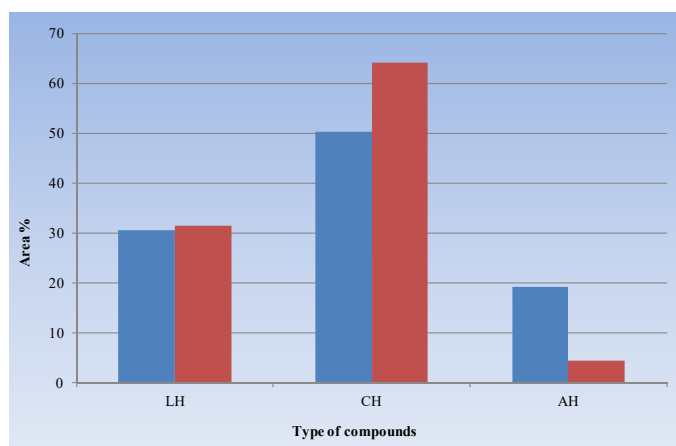

**Figure S5.**  $^1\text{H}$  NMR compositional analysis of WSF crude oil before (red column) and after (blue column) photocatalysis: distribution of the compounds as a function of chemical species.

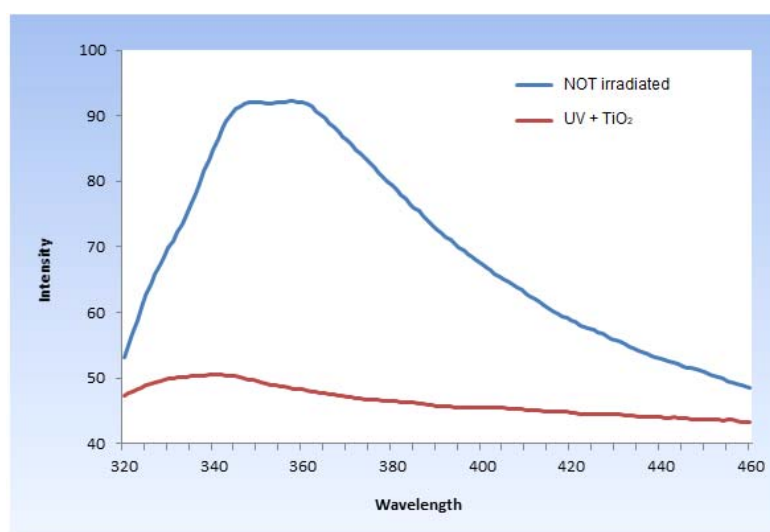

**Figure S6.** Fluorescence spectra of WSF crude oil before (**blue line**) and after (**red line**) photocatalysis.

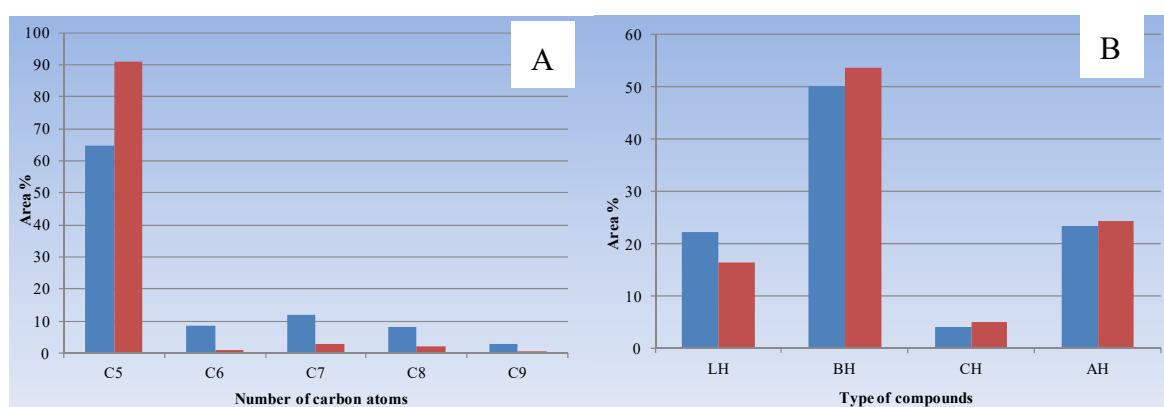

**Figure S7.** GC-MS compositional analysis of WSF crude oil before (**red column**) and after (**blue column**) sonolysis: distribution of hydrocarbons as a function of the number of carbon atoms (**A**) and distribution of the compounds as a function of chemical species (**B**).

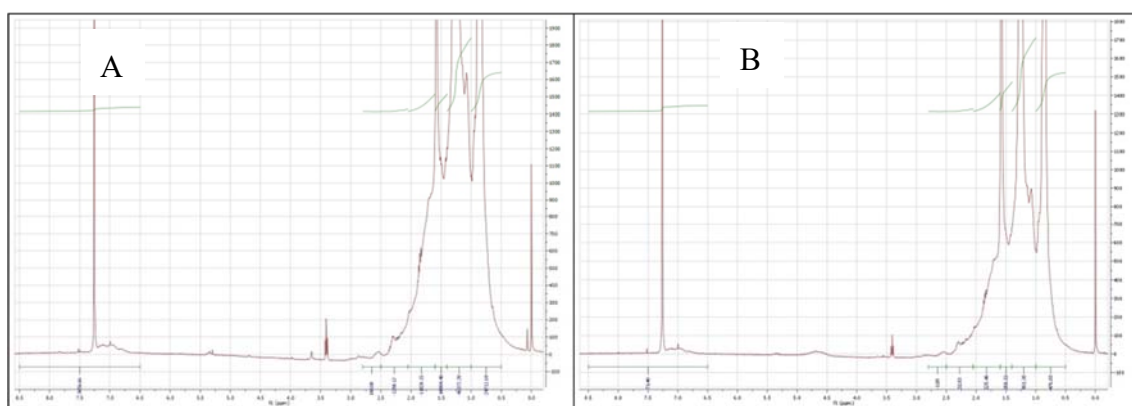

**Figure S8.** <sup>1</sup>H NMR spectra of WSF crude oil before (**A**) and after (**B**) sonolysis.

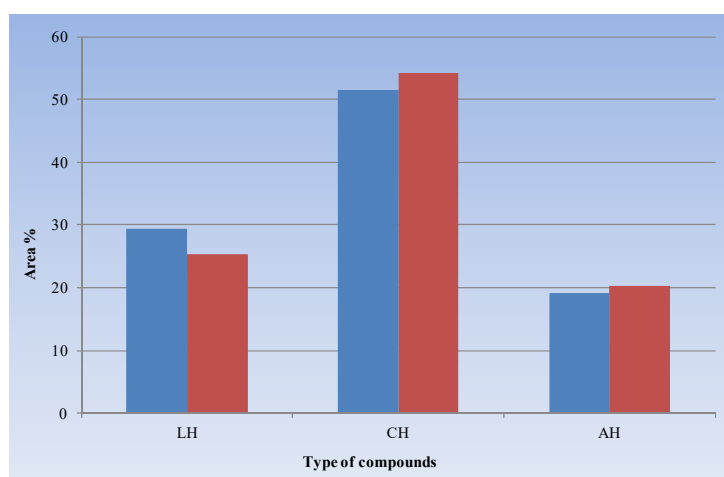

**Figure S9.**  $^1\text{H}$  NMR compositional analysis of WSF crude oil before (red column) and after (blue column) sonolysis: distribution of the compounds as a function of chemical species.

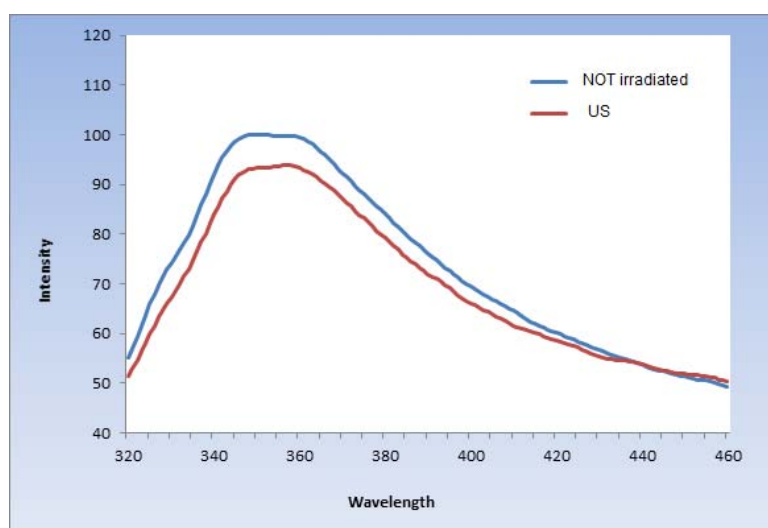

**Figure S10.** Fluorescence spectra of WSF crude oil before (blue line) and after (red line) sonolysis.

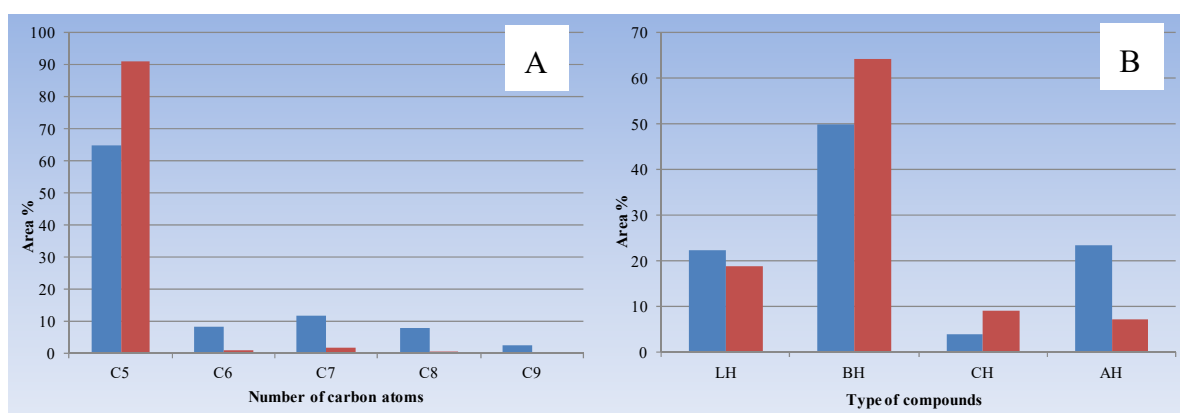

**Figure S11.** GC-MS compositional analysis of WSF crude oil before (red column) and after (blue column) sonophotocatalysis: distribution of hydrocarbons as a function of the number of carbon atoms (A) and distribution of the compounds as a function of chemical species (B).

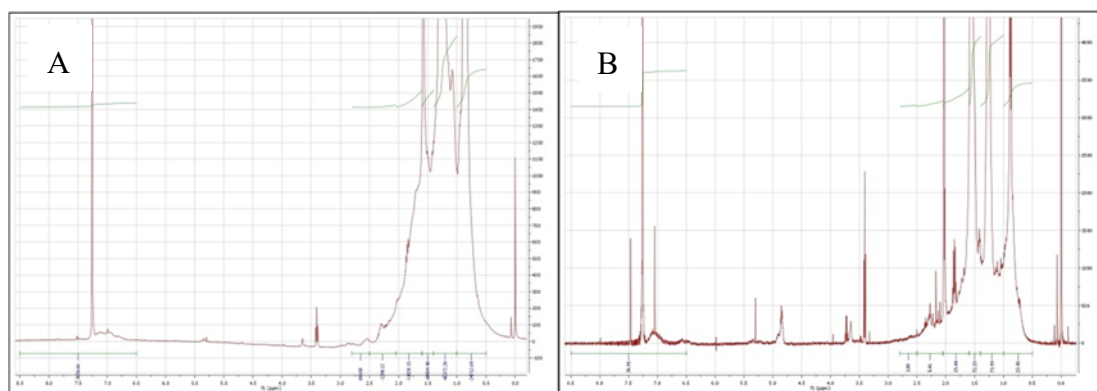

**Figure S12.**  $^1\text{H}$  NMR spectra of WSF crude oil before (A) and after (B) sonophotocatalysis.

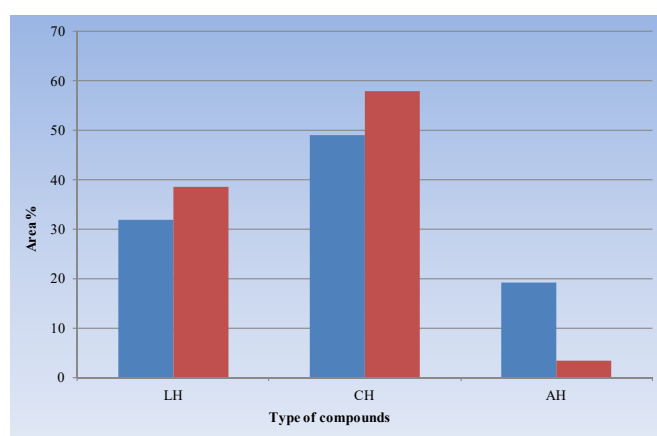

**Figure S13.**  $^1\text{H}$  NMR compositional analysis of WSF crude oil before (red column) and after (blue column) sonophotocatalysis: distribution of the compounds as a function of chemical species.

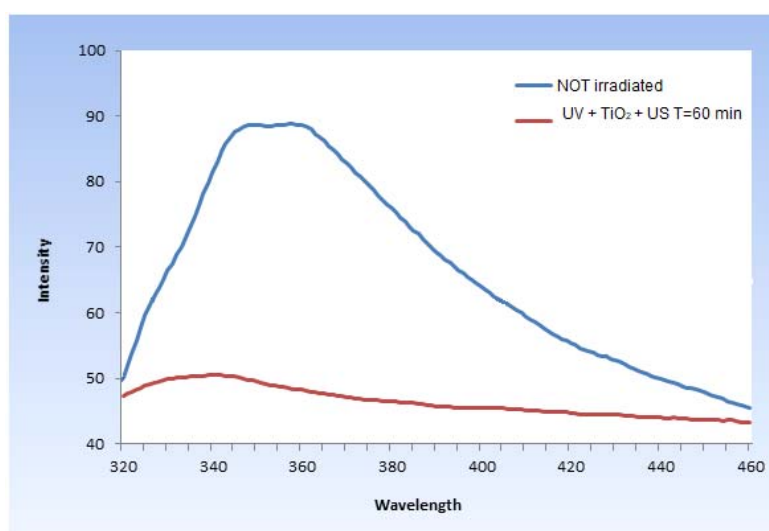

**Figure S14.** Fluorescence spectra of WSF crude oil before (blue line) and after (red line) sonophotocatalysis.
